# Supplementary material for: Exosomal Long Non-Coding Ribonucleic Acid Ribonuclease Component of Mitochondrial Ribonucleic Acid Processing Endoribonuclease Is Defined as a Potential Non-Invasive Diagnostic Biomarker for Bladder Cancer and Facilitates Tumorigenesis via the miR-206/G6PD Axis
Source: MDPI journal article supplement (doi:10.3390/cancers15215305), 2023-11-06
Supplement: s1 [file s1]

## SUPPLEMENTARY TABLES

**Supplementary Table S1. Clinical information of the patients with BLCA.**

| Number | Gender | Age<br>(years) | Tumor size<br>(≤3cm(1),<br>>3cm(2)) | Tumor<br>number | Grade | Lymph node<br>metastasis | Tumor<br>stage (T) | urine<br>cytology | NMP-22 | NMP-22<br>(ELISA)<br>ng/ml | BTA<br>(ELISA)<br>ng/ml |
|--------|--------|----------------|-------------------------------------|-----------------|-------|--------------------------|--------------------|-------------------|--------|----------------------------|-------------------------|
| 1      | Male   | 74             | 1                                   | 1               | High  | Negative                 | Ta-T1              | (+)               | (-)    | 1.86                       | 7.27078                 |
| 2      | Male   | 63             | 2                                   | 1               | High  | Negative                 | Ta-T1              | (+)               | (-)    | 1.848                      | 9.64534                 |
| 3      | Male   | 74             | 1                                   | 1               | High  | Positive                 | Ta-T1              | (+)               | (-)    | 1.92                       | 7.68982                 |
| 4      | Male   | 47             | 1                                   | 1               | High  | Negative                 | Ta-T1              | (+)               | (-)    | 1.776                      | 2.31214                 |
| 5      | Female | 45             | 1                                   | 1               | High  | Negative                 | Ta-T1              | (-)               | (+)    | 1.812                      | 4.66924                 |
| 6      | Male   | 67             | 1                                   | 1               | High  | Negative                 | Ta-T1              | (-)               | (-)    | 1.908                      | 3.88354                 |
| 7      | Male   | 71             | 1                                   | 1               | High  | Negative                 | Ta-T1              | (-)               | (-)    | 1.824                      | 5.50732                 |
| 8      | Male   | 84             | 2                                   | 1               | High  | Negative                 | Ta-T1              | (-)               | (+)    | 1.8                        | 3.35974                 |
| 9      | Male   | 50             | 2                                   | 1               | High  | Negative                 | Ta-T1              | (+)               | (-)    | 1.656                      | 3.65656                 |
| 10     | Male   | 71             | 1                                   | 1               | High  | Negative                 | Ta-T1              | (-)               | (-)    | 1.692                      | 3.1153                  |
| 11     | Male   | 65             | 2                                   | 1               | High  | Negative                 | Ta-T1              | (+)               | (+)    | 1.752                      | 1.1947                  |
| 12     | Male   | 79             | 1                                   | 1               | High  | Negative                 | Ta-T1              | (+)               | (-)    | 1.668                      | 4.93114                 |
| 13     | Male   | 56             | 1                                   | 1               | High  | Negative                 | Ta-T1              | (-)               | (+)    | 1.884                      | 6.55492                 |
| 14     | Male   | 59             | 1                                   | 1               | Low   | Negative                 | Ta-T1              | (-)               | (+)    | 1.8                        | 9.45328                 |
| 15     | Male   | 42             | 1                                   | 1               | High  | Negative                 | Ta-T1              | (-)               | (-)    | 1.884                      | 2.38198                 |
| 16     | Male   | 52             | 1                                   | 1               | High  | Negative                 | Ta-T1              | (+)               | (-)    | 1.74                       | 3.69148                 |
| 17     | Female | 52             | 1                                   | 1               | High  | Negative                 | Ta-T1              | (-)               | (-)    | 1.764                      | 3.86608                 |
| 18     | Male   | 71             | 2                                   | 1               | High  | Negative                 | Ta-T1              | (-)               | (+)    | 1.572                      | 6.11842                 |
| 19     | Male   | 70             | 1                                   | 1               | Low   | Negative                 | Ta-T1              | (-)               | (+)    | 1.668                      | 4.23274                 |
| 20     | Male   | 72             | 1                                   | 1               | High  | Negative                 | Ta-T1              | (-)               | (-)    | 1.824                      | 4.11052                 |

|    |        |    |   |          |      |          |       |     |     |       |          |
|----|--------|----|---|----------|------|----------|-------|-----|-----|-------|----------|
| 21 | Female | 63 | 1 | 1        | Low  | Negative | Ta-T1 | (+) | (+) | 2.004 | 8.91202  |
| 22 | Female | 46 | 1 | 1        | High | Negative | Ta-T1 | (+) | (-) | 1.728 | 4.79146  |
| 23 | Male   | 63 | 2 | Multiple | High | Negative | T2-T4 | (-) | (-) | 1.656 | 2.2423   |
| 24 | Male   | 76 | 1 | 1        | High | Negative | Ta-T1 | (+) | (-) | 1.752 | 7.84696  |
| 25 | Female | 56 | 2 | 1        | High | Negative | Ta-T1 | (+) | (-) | 1.32  | 7.18348  |
| 26 | Male   | 67 | 2 | 1        | High | Negative | Ta-T1 | (+) | (+) | 1.86  | 8.66758  |
| 27 | Male   | 81 | 2 | 1        | High | Negative | Ta-T1 | (+) | (+) | 1.836 | 6.6073   |
| 28 | Male   | 76 | 1 | 1        | High | Negative | Ta-T1 | (-) | (+) | 1.872 | 2.73118  |
| 29 | Male   | 74 | 1 | 1        | High | Negative | T2-T4 | (-) | (+) | 1.596 | 4.52956  |
| 30 | Male   | 65 | 1 | 1        | Low  | Negative | T2-T4 | (+) | (-) | 1.752 | 9.26122  |
| 31 | Male   | 33 | 1 | Multiple | High | Negative | T2-T4 | (-) | (+) | 1.812 | 3.60418  |
| 32 | Male   | 48 | 1 | Multiple | High | Negative | Ta-T1 | (-) | (-) | 1.824 | 2.83594  |
| 33 | Female | 75 | 1 | 1        | High | Negative | Ta-T1 | (+) | (+) | 1.86  | 11.4088  |
| 34 | Male   | 62 | 1 | 1        | High | Negative | Ta-T1 | (-) | (+) | 1.764 | 4.63432  |
| 35 | Male   | 67 | 1 | 1        | High | Positive | T2-T4 | (-) | (+) | 1.596 | 0.95026  |
| 36 | Male   | 63 | 1 | 2        | Low  | Negative | Ta-T1 | (-) | (-) | 1.872 | 7.89934  |
| 37 | Male   | 69 | 2 | Multiple | High | Negative | Ta-T1 | (+) | (-) | 1.896 | 6.15334  |
| 38 | Male   | 57 | 1 | 1        | High | Negative | Ta-T1 | (+) | (-) | 1.86  | 9.52312  |
| 39 | Female | 49 | 1 | 1        | High | Negative | Ta-T1 | (-) | (-) | 1.776 | 3.09784  |
| 40 | Female | 54 | 1 | 1        | Low  | Positive | T2-T4 | (-) | (-) | 1.848 | 8.47552  |
| 41 | Male   | 67 | 2 | 1        | Low  | Negative | T2-T4 | (-) | (-) | 1.632 | 5.68192  |
| 42 | Male   | 88 | 1 | Multiple | Low  | Negative | T2-T4 | (-) | (+) | 1.692 | 0.21694  |
| 43 | Male   | 81 | 1 | 1        | High | Negative | Ta-T1 | (-) | (-) | 1.644 | 16.62934 |
| 44 | Female | 58 | 2 | 1        | High | Negative | Ta-T1 | (-) | (-) | 1.692 | 7.93426  |
| 45 | Female | 71 | 2 | 1        | High | Negative | Ta-T1 | (-) | (+) | 1.836 | 7.46284  |

|    |        |    |   |          |      |          |       |     |     |       |          |
|----|--------|----|---|----------|------|----------|-------|-----|-----|-------|----------|
| 46 | Female | 49 | 1 | 1        | High | Negative | Ta-T1 | (+) | (-) | 1.344 | 7.2184   |
| 47 | Female | 58 | 2 | 1        | High | Negative | T2-T4 | (+) | (+) | 1.872 | 11.16436 |
| 48 | Male   | 87 | 1 | 1        | High | Negative | T2-T4 | (+) | (+) | 2.016 | 6.65968  |
| 49 | Male   | 73 | 1 | 1        | High | Negative | Ta-T1 | (+) | (-) | 3.204 | 11.79292 |
| 50 | Male   | 69 | 1 | 1        | High | Negative | Ta-T1 | (-) | (-) | 1.764 | 9.8374   |
| 51 | Female | 55 | 2 | 1        | High | Positive | Ta-T1 | (+) | (-) | 1.764 | 4.45972  |
| 52 | Female | 55 | 2 | 1        | High | Negative | T2-T4 | (-) | (-) | 1.764 | 6.81682  |
| 53 | Female | 71 | 1 | 1        | High | Negative | Ta-T1 | (+) | (-) | 1.884 | 6.03112  |
| 54 | Female | 58 | 1 | 1        | High | Negative | Ta-T1 | (-) | (+) | 1.848 | 7.6549   |
| 55 | Male   | 52 | 1 | 1        | High | Positive | Ta-T1 | (+) | (-) | 1.788 | 5.50732  |
| 56 | Female | 59 | 1 | Multiple | Low  | Positive | T2-T4 | (-) | (-) | 1.956 | 5.80414  |
| 57 | Male   | 68 | 2 | 1        | High | Positive | Ta-T1 | (+) | (+) | 1.908 | 5.26288  |
| 58 | Male   | 72 | 1 | 1        | Low  | Negative | Ta-T1 | (+) | (-) | 1.74  | 3.34228  |
| 59 | Female | 68 | 1 | 1        | High | Negative | Ta-T1 | (-) | (-) | 1.668 | 8.66758  |
| 60 | Male   | 55 | 1 | 2        | High | Negative | Ta-T1 | (-) | (-) | 1.764 | 10.29136 |
| 61 | Male   | 74 | 1 | 1        | High | Negative | Ta-T1 | (+) | (-) | 1.92  | 13.18972 |
| 62 | Female | 53 | 1 | 1        | High | Negative | Ta-T1 | (+) | (+) | 1.776 | 15.14524 |
| 63 | Male   | 70 | 1 | Multiple | High | Negative | T2-T4 | (-) | (-) | 1.752 | 8.37076  |
| 64 | Male   | 71 | 1 | 1        | High | Negative | Ta-T1 | (+) | (+) | 1.14  | 4.6867   |
| 65 | Male   | 58 | 1 | 1        | Low  | Negative | Ta-T1 | (-) | (+) | 1.848 | 11.63578 |
| 66 | Male   | 70 | 1 | 1        | High | Negative | Ta-T1 | (+) | (+) | 1.848 | 9.88978  |
| 67 | Male   | 66 | 1 | 1        | High | Negative | Ta-T1 | (+) | (-) | 1.524 | 9.47074  |
| 68 | Female | 58 | 1 | 1        | High | Negative | T2-T4 | (-) | (-) | 1.86  | 3.04546  |
| 69 | Male   | 63 | 1 | 1        | Low  | Positive | T2-T4 | (-) | (-) | 1.848 | 8.42314  |
| 70 | Male   | 72 | 2 | 2        | High | Negative | T2-T4 | (-) | (+) | 1.74  | 5.62954  |

|    |        |    |   |          |      |          |       |     |     |       |          |
|----|--------|----|---|----------|------|----------|-------|-----|-----|-------|----------|
| 71 | Male   | 68 | 2 | 2        | High | Negative | Ta-T1 | (-) | (-) | 1.056 | 0.16456  |
| 72 | Male   | 42 | 2 | 1        | High | Negative | T2-T4 | (+) | (-) | 1.908 | 7.58506  |
| 73 | Female | 67 | 1 | 1        | High | Negative | Ta-T1 | (+) | (-) | 1.416 | 9.06916  |
| 74 | Male   | 46 | 1 | 1        | High | Negative | Ta-T1 | (-) | (+) | 1.272 | 7.00888  |
| 75 | Male   | 71 | 1 | 1        | High | Negative | Ta-T1 | (+) | (+) | 1.812 | 3.13276  |
| 76 | Male   | 54 | 1 | 1        | High | Negative | Ta-T1 | (+) | (+) | 1.596 | 4.93114  |
| 77 | Male   | 55 | 2 | Multiple | High | Positive | T2-T4 | (+) | (+) | 1.56  | 9.6628   |
| 78 | Male   | 67 | 2 | 1        | High | Positive | T2-T4 | (-) | (+) | 1.716 | 9.2263   |
| 79 | Male   | 68 | 1 | 1        | High | Negative | Ta-T1 | (+) | (-) | 1.644 | 6.4327   |
| 80 | Male   | 55 | 1 | 1        | High | Negative | Ta-T1 | (-) | (-) | 1.8   | 0.96772  |
| 81 | Male   | 54 | 1 | 1        | Low  | Negative | Ta-T1 | (+) | (+) | 3.024 | 8.38822  |
| 82 | Male   | 73 | 1 | 1        | High | Negative | Ta-T1 | (+) | (-) | 1.752 | 9.87232  |
| 83 | Male   | 63 | 2 | 1        | High | Negative | T2-T4 | (-) | (-) | 1.596 | 7.81204  |
| 84 | Female | 56 | 1 | 1        | High | Negative | Ta-T1 | (+) | (+) | 1.788 | 3.93592  |
| 85 | Male   | 69 | 2 | 1        | High | Negative | Ta-T1 | (-) | (+) | 1.668 | 5.7343   |
| 86 | Female | 75 | 2 | 1        | High | Negative | Ta-T1 | (-) | (+) | 1.824 | 10.46596 |
| 87 | Male   | 67 | 1 | 1        | High | Negative | T2-T4 | (-) | (+) | 2.7   | 10.64056 |
| 88 | Female | 91 | 1 | 2        | High | Negative | Ta-T1 | (-) | (+) | 1.812 | 5.26288  |
| 89 | Male   | 55 | 2 | 2        | High | Negative | T2-T4 | (-) | (-) | 1.836 | 7.61998  |
| 90 | Female | 73 | 2 | 2        | High | Negative | Ta-T1 | (-) | (-) | 1.968 | 8.91202  |
| 91 | Female | 83 | 2 | 2        | High | Negative | T2-T4 | (-) | (-) | 2.04  | 8.12632  |
| 92 | Male   | 64 | 2 | 2        | High | Negative | Ta-T1 | (-) | (-) | 2.136 | 9.7501   |
| 93 | Male   | 71 | 1 | 1        | High | Negative | Ta-T1 | (-) | (-) | 1.764 | 7.60252  |
| 94 | Male   | 64 | 1 | 1        | High | Negative | T2-T4 | (+) | (+) | 1.98  | 7.89934  |
| 95 | Male   | 85 | 2 | 1        | High | Negative | T2-T4 | (-) | (+) | 2.16  | 7.35808  |

|    |        |    |   |   |      |          |       |     |     |       |          |
|----|--------|----|---|---|------|----------|-------|-----|-----|-------|----------|
| 96 | Male   | 59 | 1 | 1 | Low  | Negative | Ta-T1 | (-) | (-) | 1.92  | 5.43748  |
| 97 | Female | 92 | 1 | 1 | Low  | Positive | T2-T4 | (-) | (+) | 2.28  | 10.76278 |
| 98 | Male   | 71 | 1 | 2 | Low  | Negative | Ta-T1 | (+) | (-) | 2.784 | 12.38656 |
| 99 | Male   | 75 | 2 | 2 | High | Negative | Ta-T1 | (-) | (-) | 2.652 | 15.28492 |

**Supplementary Table S2. Relevant qPCR primer sequences.**

| Gene Name | Forward (5' to 3')    | Reverse (5' to 3')     |
|-----------|-----------------------|------------------------|
| RMRP      | TGCTGAAGGCCTGTATCCT   | TGAGAATGAGCCCCGTGT     |
| GAPDH     | ACCCACTCCTCCACCTTTGAC | TGTTGCTGTAGCCAAATTCGTT |
| 18S RNA   | CGTTCTTAGTTGGTGGAGCG  | CGCTGAGCCAGTCAGTGTAG   |

**Supplementary Table S3. The expression of RMRP and GAPDH in tumor tissues of BLCA patients.**

| Number | Ct Value      |             |             |             |
|--------|---------------|-------------|-------------|-------------|
|        | Adjacent (30) |             | BLCA(n=40)  |             |
|        | GAPDH         | RMRP        | GAPDH       | RMRP        |
| 1      | 23.52         | 20.03       | 22.32       | 20.53       |
| 2      | 23.24666667   | 21.54666667 | 22.52       | 20.89666667 |
| 3      | 22.53666667   | 24.23       | 23.85666667 | 19.57333333 |
| 4      | 18.53666667   | 18.34       | 17.62666667 | 15.36333333 |
| 5      | 19.81         | 15.08333333 | 29.58       | 25.55       |
| 6      | 32.56666667   | 30.09333333 | 25.99333333 | 20.79666667 |
| 7      | 24.63         | 22.03       | 29.63333333 | 25.05666667 |
| 8      | 22.42666667   | 19.27666667 | 18.43666667 | 17.15333333 |
| 9      | 30.16666667   | 28.30666667 | 21.72333333 | 16.22666667 |
| 10     | 33.25666667   | 32.59666667 | 29.95       | 29.63333333 |
| 11     | 32.41333333   | 28.06       | 18.18666667 | 14.87       |
| 12     | 29.85666667   | 28.10666667 | 29.09666667 | 25.45       |
| 13     | 24.49666667   | 24.53666667 | 29.58666667 | 29.16666667 |
| 14     | 23.03333333   | 22.33666667 | 20.94666667 | 17.95       |
| 15     | 26.25         | 21.55333333 | 19.62333333 | 14          |
| 16     | 24.68666667   | 19.99333333 | 19.68       | 15.47666667 |
| 17     | 18.28666667   | 14.76666667 | 26.48666667 | 20.79       |
| 18     | 25.71         | 23.14       | 23.50333333 | 24.80666667 |
| 19     | 27.42         | 22.59       | 23.12333333 | 17.23       |
| 20     | 25.76         | 23.89666667 | 29.47       | 26.26666667 |

|    |             |             |             |             |
|----|-------------|-------------|-------------|-------------|
| 21 | 32.77666667 | 31.17333333 | 33.76       | 28.44333333 |
| 22 | 21.81666667 | 21.02       | 21.35333333 | 22.61       |
| 23 | 33.34       | 32.52666667 | 27.62666667 | 22.12333333 |
| 24 | 21.42333333 | 16.58666667 | 26.36666667 | 25.4        |
| 25 | 25.37666667 | 24.14       | 21.43666667 | 16.4        |
| 26 | 24.74333333 | 20.93333333 | 25.94       | 24.44666667 |
| 27 | 21.65       | 16.68       | 18.66333333 | 14.47       |
| 28 | 18.60333333 | 16.92666667 | 20.66666667 | 16.98       |
| 29 | 26.59       | 28.16       | 27.19666667 | 23.13       |
| 30 | 18.64333333 | 15.43       | 21.52333333 | 18.42666667 |
| 31 |             |             | 18.37       | 14.38       |
| 32 |             |             | 17.23       | 17.36       |
| 33 |             |             | 14.74333333 | 13.76       |
| 34 |             |             | 19.07333333 | 13.71666667 |
| 35 |             |             | 17.87666667 | 16.69       |
| 36 |             |             | 20.87       | 14.94       |
| 37 |             |             | 21.21       | 16.4        |
| 38 |             |             | 18.59333333 | 16.92666667 |
| 39 |             |             | 13.33       | 12.60666667 |
| 40 |             |             | 18.66       | 15.23666667 |



**Supplementary Table S4. The expression of RMRP and 18s RNA in urine- and plasma- exosomes**

| Ct Value in urine and plasma exosomes |               |       |                      |       |             |       |               |        |                      |       |             |       |
|---------------------------------------|---------------|-------|----------------------|-------|-------------|-------|---------------|--------|----------------------|-------|-------------|-------|
| Number                                | Urine         |       |                      |       |             |       | Plasma        |        |                      |       |             |       |
|                                       | Normal (n=84) |       | Benign lesion (n=50) |       | BLCA (n=99) |       | Normal (n=84) |        | Benign lesion (n=50) |       | BLCA (n=99) |       |
|                                       | 18S           | RMRP  | 18S                  | RMRP  | 18S         | RMRP  | 18S           | RMRP   | 18S                  | RMRP  | 18S         | RMRP  |
| 1                                     | 14.375        | 29.49 | 16.72                | 30.3  | 13.11       | 28.87 | 12.43         | 25.555 | 15.89                | 28.56 | 13.97       | 26.31 |
| 2                                     | 17.395        | 30.86 | 9.16                 | 22.77 | 16.78       | 31.55 | 9.3           | 22.235 | 14.78                | 28.39 | 14.35       | 28.88 |
| 3                                     | 16.875        | 27.5  | 14.605               | 25.96 | 15.95       | 28.61 | 10.92         | 23.935 | 12.98                | 25.89 | 15.18       | 28.17 |
| 4                                     | 12.37         | 26.48 | 9.605                | 23.89 | 16.82       | 34.14 | 12.88         | 25.04  | 16.93                | 29.39 | 14.82       | 27.92 |
| 5                                     | 20.15         | 32.39 | 11.115               | 25.18 | 13.94       | 30.78 | 10.125        | 23.01  | 15.98                | 29.47 | 14.93       | 27.86 |
| 6                                     | 11.77         | 23.04 | 12.14                | 24.66 | 16.68       | 30.82 | 11.2          | 21.78  | 14.89                | 27.39 | 15.28       | 27.1  |
| 7                                     | 12.605        | 28.01 | 12.7                 | 24.55 | 15.72       | 32.13 | 12.11         | 25.02  | 12.92                | 28.87 | 15.02       | 28    |
| 8                                     | 13.49         | 25.49 | 9.92                 | 21.42 | 15.45       | 26.38 | 13.07         | 25.155 | 15.05                | 28.25 | 13.92       | 25.71 |
| 9                                     | 9.85          | 23.03 | 12.005               | 24.6  | 17.005      | 27.59 | 13.63         | 27.54  | 16.45                | 28.95 | 14.44       | 27.11 |
| 10                                    | 12.545        | 25.66 | 11.595               | 25.8  | 15.82       | 31.1  | 11.265        | 23.335 | 14.07                | 29.4  | 14.28       | 28.61 |
| 11                                    | 11.435        | 23.99 | 9.79                 | 22.1  | 12.32       | 25.21 | 12.44         | 25.81  | 15.09                | 29.3  | 15.09       | 27.89 |
| 12                                    | 11.595        | 24.74 | 10.405               | 22.74 | 15.8        | 29.68 | 10.88         | 23.7   | 14.87                | 27.59 | 15.61       | 27.76 |
| 13                                    | 12.225        | 23.75 | 11.6                 | 23.24 | 12.85       | 28.17 | 12.015        | 25.61  | 16.97                | 29.91 | 13.98       | 28.11 |
| 14                                    | 11.88         | 25.16 | 13.12                | 24.71 | 14.22       | 29.02 | 11.27         | 25.13  | 17.3                 | 26.61 | 14.23       | 27.31 |
| 15                                    | 10.865        | 21.28 | 12.02                | 24.36 | 15.85       | 34.62 | 10.41         | 23.795 | 15.7                 | 28.09 | 16.19       | 28.16 |
| 16                                    | 9.685         | 20.49 | 9.03                 | 23.39 | 17.42       | 32.14 | 14.815        | 28.21  | 18.83                | 31.63 | 13.69       | 27.04 |
| 17                                    | 9.845         | 25.43 | 12.85                | 22.66 | 15.06       | 29.75 | 10.55         | 22.295 | 17.01                | 31.02 | 15.1        | 27.08 |
| 18                                    | 12.95         | 26.45 | 11.265               | 25.57 | 8.545       | 17.88 | 10.25         | 24.84  | 12.3                 | 27.42 | 14.14       | 26.59 |
| 19                                    | 11.875        | 26.72 | 10.195               | 24.26 | 16.74       | 31.75 | 12.28         | 25.125 | 15.91                | 27.29 | 14.46       | 27.8  |

|    |          |          |        |       |        |       |        |        |        |        |        |        |
|----|----------|----------|--------|-------|--------|-------|--------|--------|--------|--------|--------|--------|
| 20 | 12.95    | 30.31    | 13.495 | 25.56 | 18.345 | 25.5  | 12.805 | 25.25  | 13.9   | 28.37  | 14.42  | 27.31  |
| 21 | 16.19735 | 30.91175 | 11.39  | 23.72 | 15.22  | 30.8  | 12.38  | 25.99  | 14.78  | 25.55  | 15.81  | 27.01  |
| 22 | 11.81    | 26.41    | 12.825 | 24.45 | 16.05  | 32.68 | 13.095 | 25.26  | 12.18  | 27.46  | 14.47  | 27.71  |
| 23 | 11.55    | 25.81    | 9.88   | 20.31 | 16.4   | 31.54 | 13.085 | 25.695 | 12.12  | 25.28  | 14.64  | 27.25  |
| 24 | 11.385   | 24.41    | 11.61  | 22.51 | 15.84  | 30.81 | 12.335 | 25.135 | 16.87  | 30.46  | 14.91  | 27.35  |
| 25 | 12.375   | 22.54    | 12.85  | 24.82 | 14.99  | 28.14 | 10.57  | 20.965 | 12.09  | 27.17  | 15.44  | 26.93  |
| 26 | 12.6     | 25.42    | 12.785 | 25.66 | 10.18  | 20.66 | 11.565 | 25.63  | 14.76  | 25.29  | 15.33  | 27.1   |
| 27 | 12.89    | 26.04    | 9.95   | 24.48 | 16.31  | 30.04 | 14.88  | 28     | 13.98  | 27.39  | 14.67  | 26.5   |
| 28 | 10.28    | 23.49    | 10.95  | 20.35 | 13.04  | 24.77 | 10.99  | 23.945 | 14.34  | 26.46  | 15.105 | 24.165 |
| 29 | 11.735   | 24.82    | 13.955 | 27.53 | 12.725 | 25.66 | 11.575 | 24.745 | 16.14  | 28.55  | 14.965 | 23.75  |
| 30 | 12.99    | 27       | 13.705 | 23.53 | 10.175 | 24.75 | 11.33  | 24.195 | 11.54  | 25.005 | 15.61  | 23.855 |
| 31 | 11.17    | 28.84    | 17.89  | 28.4  | 15.49  | 30.48 | 18.255 | 30.2   | 13.045 | 25.655 | 12.36  | 20.56  |
| 32 | 14.385   | 24.78    | 14.88  | 28.58 | 14.71  | 26.49 | 18.83  | 32.505 | 22.05  | 34.53  | 10.52  | 22.64  |
| 33 | 11.61    | 24.64    | 11.76  | 24.85 | 12.48  | 26.45 | 11.985 | 27.925 | 15.815 | 29.21  | 15.02  | 24.21  |
| 34 | 11.07    | 26.38    | 11.81  | 23.72 | 14.06  | 27.46 | 12.265 | 28.92  | 18.43  | 31.475 | 14.57  | 24.765 |
| 35 | 15.835   | 28.02    | 14.765 | 27.35 | 17.03  | 28.51 | 12.93  | 32.84  | 16.54  | 28.91  | 14.15  | 22.865 |
| 36 | 11.685   | 26.26    | 12.91  | 26.86 | 13.97  | 26.46 | 12.97  | 29.04  | 17.055 | 29.52  | 14.035 | 22.57  |
| 37 | 13.86    | 26.91    | 12.815 | 27.31 | 18.24  | 28.99 | 15.04  | 30.935 | 14.344 | 27.344 | 14.11  | 24.355 |
| 38 | 12.895   | 27.38    | 12.71  | 25.95 | 17.91  | 27.35 | 13.12  | 29.21  | 13.69  | 26.19  | 14.23  | 22.71  |
| 39 | 12.135   | 26.82    | 11.745 | 24.96 | 17.45  | 27.55 | 13.4   | 28.33  | 17.46  | 32.76  | 11.18  | 21.5   |
| 40 | 11.935   | 25.57    | 10.845 | 24.59 | 18.25  | 26.7  | 13.13  | 29.915 | 12.36  | 29.76  | 12.85  | 22.06  |
| 41 | 11.705   | 24.33    | 12.01  | 24.83 | 19.24  | 32.21 | 12.52  | 31.155 | 17.3   | 32.6   | 13.55  | 21.545 |
| 42 | 10.06    | 24.43    | 15.975 | 26.64 | 14.74  | 26.44 | 13.085 | 30.085 | 11.9   | 24.8   | 15     | 22.915 |
| 43 | 9.85     | 23.84    | 9.96   | 21.09 | 13.96  | 25.78 | 14.18  | 28.24  | 13.8   | 29.1   | 13.005 | 28.24  |
| 44 | 9.74     | 21.5     | 11.635 | 26.93 | 11.19  | 25.39 | 14.83  | 28.92  | 17.4   | 31.7   | 13.17  | 26.77  |

|    |        |       |        |       |        |       |        |        |       |       |        |        |
|----|--------|-------|--------|-------|--------|-------|--------|--------|-------|-------|--------|--------|
| 45 | 13.555 | 24.78 | 10.815 | 23.38 | 13.14  | 22.49 | 12.815 | 30.135 | 16.8  | 32.1  | 12     | 21.755 |
| 46 | 5.57   | 20.03 | 13.415 | 26.56 | 15.7   | 27.18 | 13.415 | 31.045 | 15.4  | 30.32 | 15.175 | 25.87  |
| 47 | 9.175  | 21.73 | 10.315 | 22.58 | 18.56  | 28.76 | 14.565 | 28.66  | 13.9  | 32.3  | 14.82  | 25.81  |
| 48 | 9.865  | 23.45 | 12.855 | 27.26 | 19.71  | 28.82 | 13.425 | 28.675 | 14.5  | 29.8  | 13.425 | 21.86  |
| 49 | 12     | 24.51 | 10.755 | 24.02 | 15.93  | 30.73 | 13.365 | 30.73  | 14.98 | 28.07 | 14.205 | 22.34  |
| 50 | 10.175 | 22.34 | 12.45  | 26.36 | 14.22  | 26.91 | 13.2   | 29.3   | 13.75 | 28.04 | 13.905 | 24.63  |
| 51 | 10.68  | 23.08 |        |       | 13.85  | 25.77 | 13.17  | 30.81  |       |       | 13.07  | 22.23  |
| 52 | 11.83  | 23.93 |        |       | 19.5   | 28.51 | 12.125 | 28.785 |       |       | 17.46  | 26.015 |
| 53 | 13.78  | 24.33 |        |       | 16.78  | 28.75 | 12.56  | 28.495 |       |       | 16.16  | 25.885 |
| 54 | 10.88  | 23.28 |        |       | 15.84  | 27.38 | 13.01  | 27.63  |       |       | 12.92  | 21.885 |
| 55 | 11.53  | 24.47 |        |       | 14.86  | 28.55 | 14.36  | 27.54  |       |       | 16.03  | 26.79  |
| 56 | 10.04  | 24.85 |        |       | 19.03  | 27.63 | 15.09  | 29.28  |       |       | 13.67  | 21.58  |
| 57 | 10.755 | 24.02 |        |       | 8.145  | 20    | 15.78  | 29.81  |       |       | 13.18  | 22.055 |
| 58 | 10.89  | 24.25 |        |       | 17.49  | 27.37 | 15.87  | 29.47  |       |       | 14.96  | 23.43  |
| 59 | 9.605  | 23.46 |        |       | 17.06  | 25.81 | 16.94  | 28.67  |       |       | 13.98  | 22.69  |
| 60 | 9.845  | 23.49 |        |       | 13.03  | 26.61 | 14.78  | 28.37  |       |       | 15.16  | 25.715 |
| 61 | 11.01  | 24.81 |        |       | 17.26  | 26.79 | 17.76  | 31.48  |       |       | 14.4   | 27.54  |
| 62 | 10.98  | 24.86 |        |       | 17.93  | 27.51 | 14.87  | 28.59  |       |       | 13.48  | 25.06  |
| 63 | 10.245 | 24.84 |        |       | 18.47  | 28.73 | 16.7   | 29.44  |       |       | 13.87  | 27.335 |
| 64 | 12.7   | 26.65 |        |       | 17.79  | 31.91 | 15.89  | 28.26  |       |       | 14.36  | 24.84  |
| 65 | 9.86   | 23.74 |        |       | 17.61  | 27.66 | 15.89  | 28.57  |       |       | 15.87  | 25.4   |
| 66 | 10.015 | 24.05 |        |       | 13.02  | 26.14 | 14.28  | 27.39  |       |       | 14.63  | 24.855 |
| 67 | 10.255 | 25.49 |        |       | 12.005 | 27.01 | 13.48  | 29.48  |       |       | 13.28  | 23.58  |
| 68 | 10.2   | 24.78 |        |       | 17.22  | 27.33 | 14.87  | 28.04  |       |       | 15.77  | 24.635 |
| 69 | 10.785 | 24.4  |        |       | 10.93  | 23.55 | 14.05  | 27.4   |       |       | 14.835 | 27.26  |

|    |        |       |  |  |        |       |       |       |  |  |        |        |
|----|--------|-------|--|--|--------|-------|-------|-------|--|--|--------|--------|
| 70 | 11.02  | 24.16 |  |  | 18.22  | 27.41 | 15.87 | 29.47 |  |  | 12.51  | 25.19  |
| 71 | 8.905  | 22.3  |  |  | 16.27  | 31.32 | 14.43 | 27.81 |  |  | 14.33  | 26.69  |
| 72 | 15.96  | 27.56 |  |  | 16.75  | 27.86 | 13.78 | 27.54 |  |  | 14.615 | 26.785 |
| 73 | 11.57  | 25.61 |  |  | 16.96  | 28.64 | 13.37 | 27.24 |  |  | 14.94  | 28.355 |
| 74 | 13.705 | 25.81 |  |  | 10.595 | 23.31 | 14.67 | 29.49 |  |  | 14.965 | 29.165 |
| 75 | 13.515 | 25.98 |  |  | 11.625 | 24.99 | 16.8  | 29.77 |  |  | 14.035 | 27.775 |
| 76 | 10.845 | 23.97 |  |  | 14.03  | 27.44 | 16.79 | 28.99 |  |  | 13.55  | 26.565 |
| 77 | 10.97  | 23.74 |  |  | 15.77  | 31.33 | 16.23 | 31.11 |  |  | 13.17  | 25.245 |
| 78 | 11.5   | 25.16 |  |  | 16.32  | 26.74 | 16.97 | 29.58 |  |  | 16.16  | 26.32  |
| 79 | 10.65  | 23.7  |  |  | 13.62  | 29.76 | 13.57 | 28.26 |  |  | 13.97  | 23.13  |
| 80 | 15.51  | 28.97 |  |  | 15.73  | 29.93 | 15.87 | 28.7  |  |  | 15.9   | 24.96  |
| 81 | 11.75  | 25.72 |  |  | 16.43  | 31.78 | 14.67 | 27.64 |  |  | 16.69  | 25.89  |
| 82 | 11.79  | 24.02 |  |  | 14.32  | 20.45 | 16.87 | 29.52 |  |  | 12.27  | 23.78  |
| 83 | 9.865  | 24.01 |  |  | 16.415 | 26.02 | 16.2  | 30.68 |  |  | 12.32  | 23.89  |
| 84 | 11.975 | 25.76 |  |  | 21.35  | 28.41 | 14.05 | 28.14 |  |  | 13.955 | 25.45  |
| 85 |        |       |  |  | 13.72  | 27.82 |       |       |  |  | 13.95  | 27.235 |
| 86 |        |       |  |  | 16.07  | 25.9  |       |       |  |  | 12.415 | 23.335 |
| 87 |        |       |  |  | 14.35  | 21.03 |       |       |  |  | 14.165 | 24.545 |
| 88 |        |       |  |  | 13.65  | 24.93 |       |       |  |  | 16.925 | 28.315 |
| 89 |        |       |  |  | 14.35  | 22.44 |       |       |  |  | 13.925 | 24.84  |
| 90 |        |       |  |  | 14.65  | 27.69 |       |       |  |  | 14.11  | 24.415 |
| 91 |        |       |  |  | 15.4   | 24.5  |       |       |  |  | 10.375 | 20.805 |
| 92 |        |       |  |  | 14.82  | 24.79 |       |       |  |  | 13.69  | 24.86  |
| 93 |        |       |  |  | 15.74  | 26.38 |       |       |  |  | 16.375 | 26.595 |
| 94 |        |       |  |  | 12.83  | 23.8  |       |       |  |  | 15.82  | 24.74  |

|    |  |  |  |  |        |       |  |  |  |  |        |        |
|----|--|--|--|--|--------|-------|--|--|--|--|--------|--------|
| 95 |  |  |  |  | 10.335 | 19.24 |  |  |  |  | 14.73  | 28.15  |
| 96 |  |  |  |  | 17.49  | 30.22 |  |  |  |  | 11.76  | 22.595 |
| 97 |  |  |  |  | 12.73  | 21.17 |  |  |  |  | 13.4   | 24.145 |
| 98 |  |  |  |  | 16.925 | 31.75 |  |  |  |  | 13.9   | 24.895 |
| 99 |  |  |  |  | 11.98  | 25.32 |  |  |  |  | 14.165 | 25.135 |
